# Supplementary material
Source: PubMed Central journal article supplement (PMC7329196)
Supplement: jci-130-132814-s008.pdf [file jci-130-132814-s008.pdf]

## Supplemental Figures

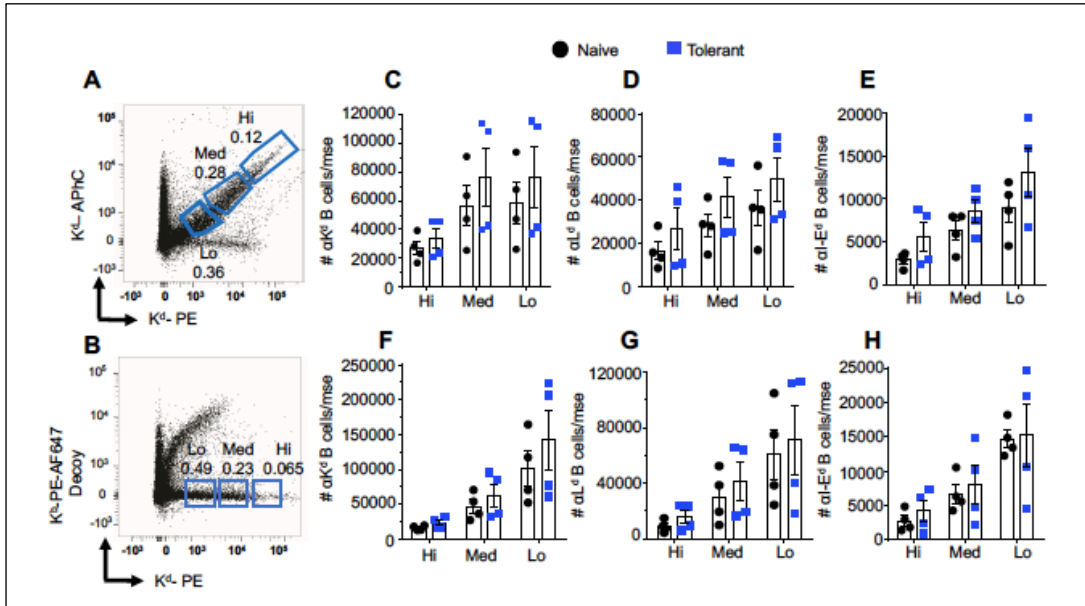

**Supplemental Figure 1. Comparable numbers of B cells from B/6 naïve or tolerant mice bind to donor MHC tetramers with high (Hi), medium (Med) and low (Lo) mean fluorescence intensity (MFI).** Representative flow plots of H-2K<sup>d</sup> tetramer-binding B cells from naïve B/6 mice were divided into tetramer Hi, Med and Lo subsets, using (A) double-positive donor MHC Class I (K<sup>d</sup>) tetramer conjugated to PE or APhC fluorochromes, and alternative (B) decoy K<sup>b</sup> (recipient MHC)-tetramer conjugated to PE and AF647 and incubated with K<sup>d</sup>-PE tetramers. Total number of (C) αK<sup>d</sup>, (D) αL<sup>d</sup>, (E) αI-E<sup>d</sup>-tetramer binding B cells with Hi, Med and Lo (MFI) from naïve (black circle) or Tol mice (blue square) using dual fluorochrome single tetramer approach, *n*=4/group. Total number of (F) αK<sup>d</sup>, (G) αL<sup>d</sup>, (H) αI-E<sup>d</sup> specific B cells with Hi, Med and Lo (MFI) from naïve (black circle) vs Tol mice (blue square) using decoy tetramer approach, *n*=4/group. Data represent mean ± SEM. Statistical significance by unpaired two-tailed Student's t test.

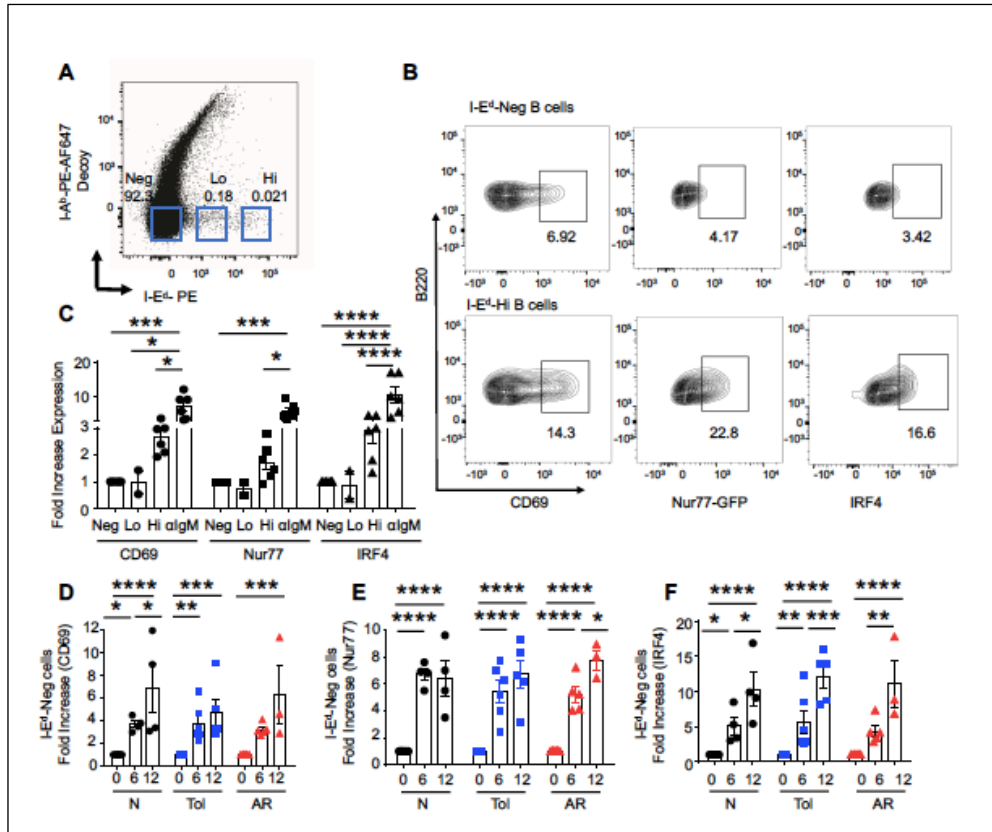

**Supplemental Figure 2. Early BCR signaling by alloreactive B cells.** (A) Representative flow plot showing flow sort I-E<sup>d</sup>-Neg, I-E<sup>d</sup>-Lo, and I-E<sup>d</sup>-Hi B cells populations. (B) Representative flow plots depicting CD69, Nur77, and IRF4 expression in I-E<sup>d</sup>-Neg B cells and I-E<sup>d</sup>-Hi B cells. (C) Fold increase in the percentage of  $\alpha$ I-E<sup>d</sup> B cells expressing CD69, Nur77 and IRF4, after stimulation with immobilized I-E<sup>d</sup> for 12 hours,  $n=2-6$  mice/group. Controls were unstimulated or  $\alpha$ IgM stimulated I-E<sup>d</sup>-Neg B cells. Time-dependent expression of (D) CD69, (E) Nur77 and (F) IRF4 by  $\alpha$ IgM stimulated I-E<sup>d</sup>-Neg B cells from naïve, tolerant ( $\geq$ day 30 post-transplant) and AR (day 7-10 post-transplant) mice,  $n=4-6$ /group. Data were normalized to unstimulated I-E<sup>d</sup>-Neg B cells cultured for 6 or 12 hours. Each dot represents an individual mouse, pooled from  $\geq 2$  independent experiments. Data are presented as mean  $\pm$  SEM. \* $p < 0.05$ , \*\* $p < 0.01$ , \*\*\* $p < 0.001$ , \*\*\*\* $p < 0.0001$  by two-way ANOVA with Tukey's post test.

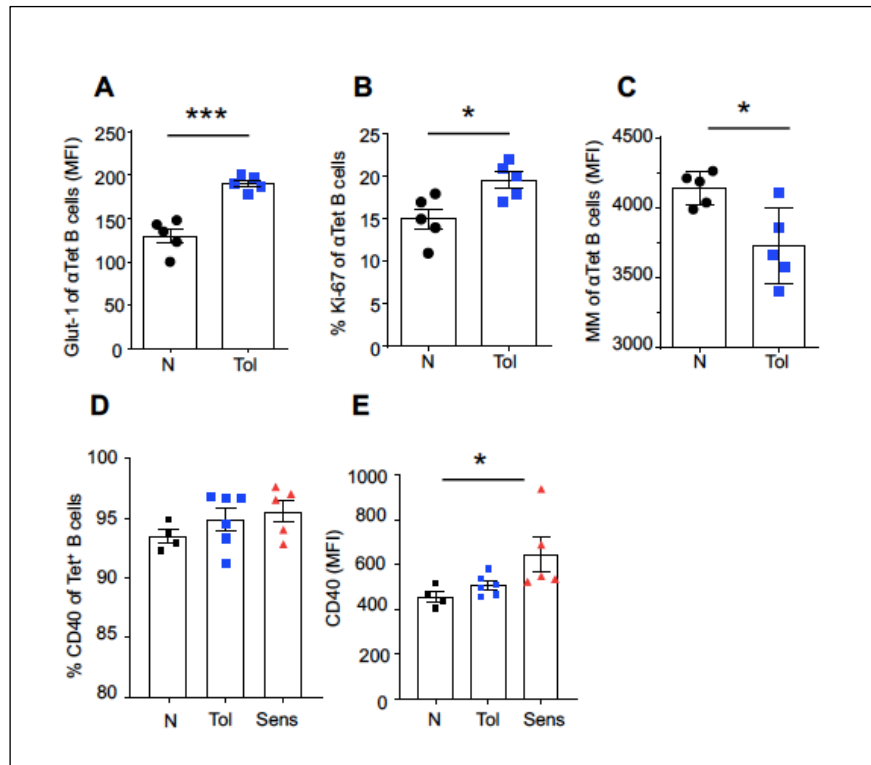

**Supplemental Figure 3. Alloreactive B cells from tolerant recipients have upregulated Glut-1 and Ki-67 expression compared to alloreactive B cells from naïve B/6. (A) Glut-1, (B) Ki-67, and (C) Mitochondrial mass (MM) of  $\alpha$ Tet B cells (MFI) analyzed from the spleen and LNs of naïve and Tol mice ( $\geq$ D30 post-transplant),  $n=5/group$ . (D) Percentage of CD40 positive and (E) MFI of CD40 expression by tetramer-binding B cells in naïve, tolerant (Tol) or sensitized (Sens) mice that had been immunized with  $2 \times 10^7$  donor B/c splenocytes in the flank, 12 days before analysis,  $n=4-6/group$ . Data represent mean  $\pm$  SEM. \* $p < 0.05$ , \*\*\* $p < 0.001$  by unpaired student's t-test.**

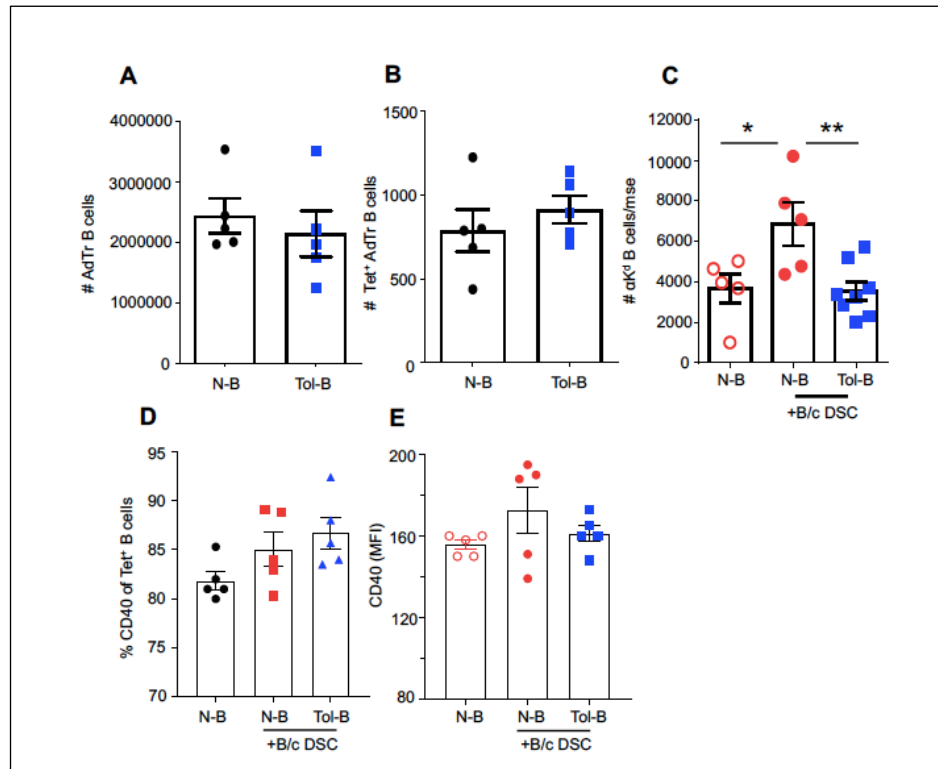

**Supplemental Figure 4. Comparable numbers of anti-K<sup>d</sup> B cells recovered from MD4 host receiving naïve or tolerant B cells.** Spleen and LNs (inguinal, axillary, branchial) were harvested from MD4 recipients receiving naïve B cells with or without B/c DSC immunization, or tolerant B cells with B/c immunization, and analyzed on day 14 post-AdTr. **(A)** Total number of recovered all AdTr naïve and Tol B cells, **(B)** and Tet<sup>+</sup> AdTr naïve B and Tol B cells, recovered on day 14 post-AdTr into MD4 mice (no DSC immunization), *n*=5/group. **(C)** Total number of αK<sup>d</sup> binding B cells, *n*=5-8/group. **(D)** Percentage of CD40-positive and **(E)** MFI of CD40 expression by naïve B and Tol B cells on day 14 post-AdTr into MD4 hosts, *n*=5/group. Data represent mean ± SEM. \**p*<0.05, \*\**p*<0.01 by one-way ANOVA with Bonferroni post test.

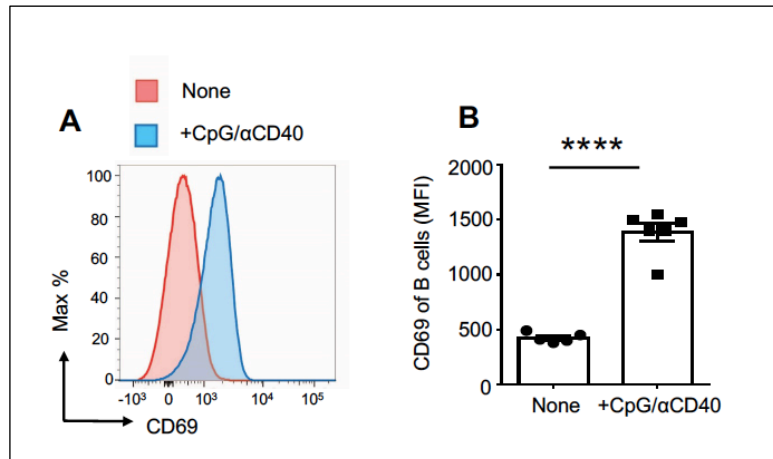

**Supplemental Figure 5. Agonistic  $\alpha$ CD40+CpG stimulates polyclonal B cell activation. (A)** Representative histogram and **(B)** quantification of CD69 (MFI) expression on B cells from naïve mice receiving CpG (100 $\mu$ g/mse, i.v. given on day 0 and 50 $\mu$ g/mse, i.p. at day 1, 2) +  $\alpha$ CD40 (100 $\mu$ g/mse, i.v. at day 0). Mice were sacrificed on day 3 post-CpG+ $\alpha$ CD40,  $n=5-6/group$ . Data were pooled from 2 independent experiments. Data represent mean  $\pm$  SEM. \*\*\*\* $p<0.0001$  by unpaired student's t-test.

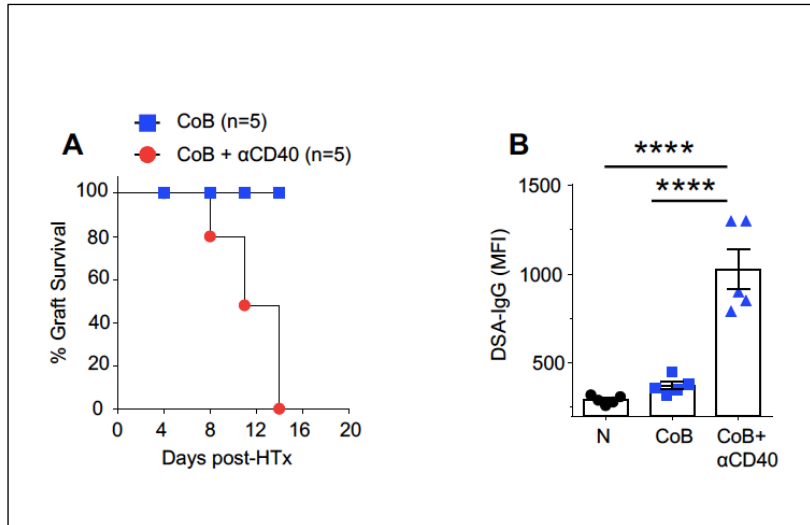

**Supplemental Figure 6. Agonistic anti-CD40 induces allograft rejection and DSA production.**

Agonistic  $\alpha$ CD40 (100 $\mu$ g/mse, i.v.) administered on D0 and D7 post-heart transplantation and tolerance treatment with anti-CD154+DSC (CoB). **(A)** Percent graft survival in tolerant mice and tolerant mice  $\pm$  agonistic  $\alpha$ CD40. **(B)** DSA-IgG (MFI) measured on D14 post-transplant,  $n=5$ /group. Data were pooled from 2 independent experiments. Data represent mean  $\pm$  SEM. \*\*\*\* $p<0.0001$  by one-way ANOVA with Bonferroni post test and percent graft survival of the heart allografts by log-rank test.

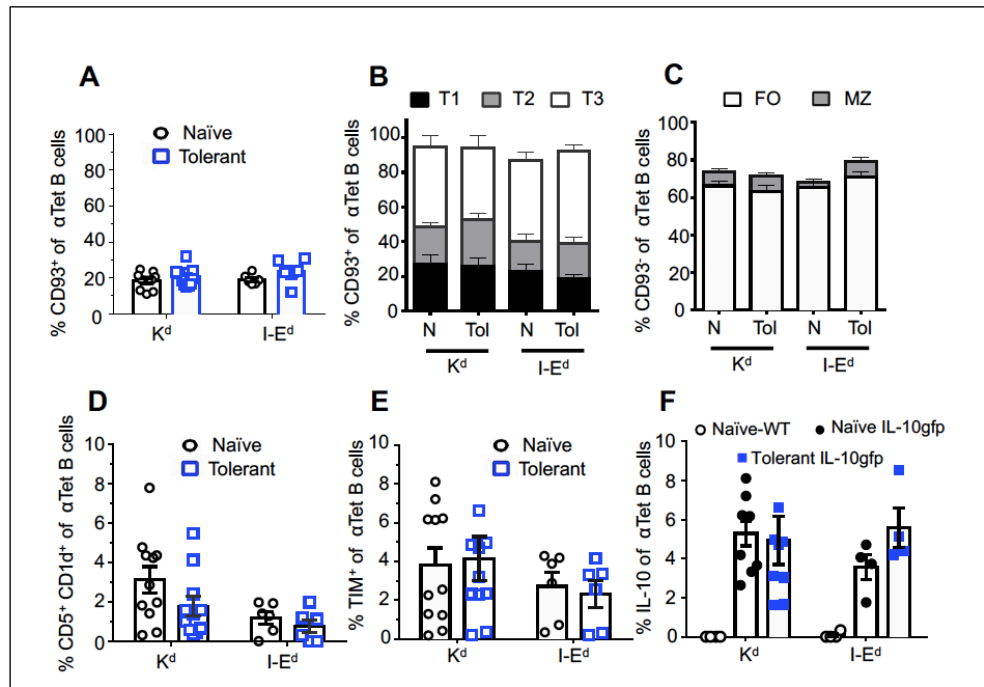

**Supplemental Figure 7. Donor-specific B cells from tolerant recipients do not exhibit enrichment of markers associated with transitional B cells and Bregs.** Analyses of B220, CD93, IgM and CD23 expression by alloreactive B cells from naive and Tol mice. Following gating on B220<sup>+</sup>Dump<sup>-</sup> cells, quantification of (A) % CD93 of  $\alpha$ K<sup>d</sup> or  $\alpha$ I-E<sup>d</sup> specific B cells,  $n=6-11/group$ . (B) T1 (IgM<sup>+</sup>CD23<sup>-</sup>), T2 (IgM<sup>+</sup>CD23<sup>+</sup>), T3 (IgM<sup>-</sup>CD23<sup>+</sup>) within the CD93<sup>+</sup>  $\alpha$ K<sup>d</sup> or  $\alpha$ I-E<sup>d</sup> B cell populations,  $n=6-9/group$ . (C) % follicular (CD21<sup>+</sup>CD23<sup>hi</sup>) and marginal zone (CD21<sup>hi</sup>CD23<sup>-</sup>) within CD93<sup>+</sup>  $\alpha$ K<sup>d</sup> or  $\alpha$ I-E<sup>d</sup> B cells,  $n=6-11/group$ . (D) % CD5<sup>+</sup>CD1d<sup>+</sup> of  $\alpha$ K<sup>d</sup> or  $\alpha$ I-E<sup>d</sup>-specific B cells,  $n=6-11/group$ . (E) % TIM<sup>+</sup> of  $\alpha$ K<sup>d</sup> or  $\alpha$ I-E<sup>d</sup> B cells in tolerant vs naive mice,  $n=6-11/group$ . (F) % of IL-10 of  $\alpha$ K<sup>d</sup> or  $\alpha$ I-E<sup>d</sup> B cells from naive B/6, or naive and tolerant IL-10 gfp-reporter mice (B6.129S6-*Il10*<sup>tm1Flv/J</sup>). Spleen and lymph node cells were stimulated with LPS, PMA + Ionomycin for 8-10 hours, and then incubated with MHC tetramers and other antibodies. GFP expression was used to assess IL-10,  $n=4-9/group$ . Data represent mean  $\pm$  SEM. Statistical significance by two-way ANOVA with Tukey's post test and Kruskal-Wallis or Holm-Sidak's multiple comparison tests.

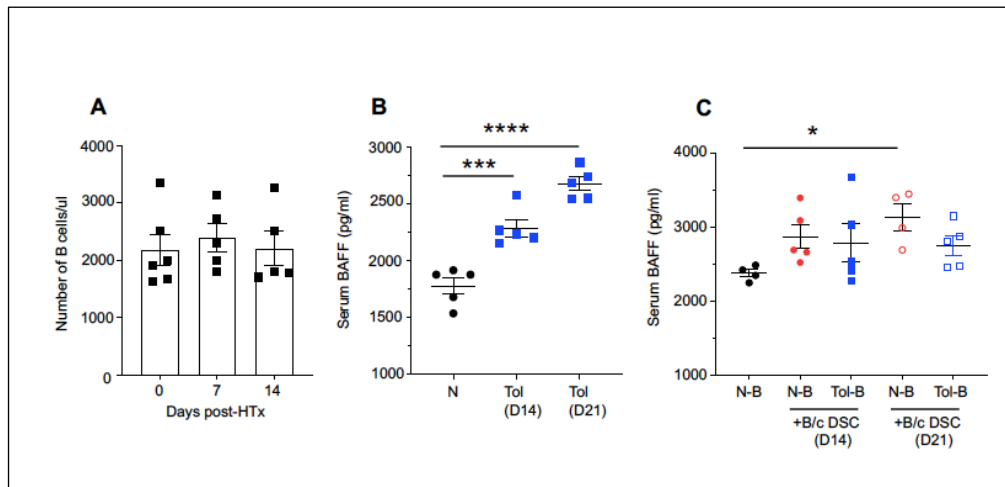

**Supplemental Figure 8. No B cells deletion and no reduction of circulating BAFF in tolerant recipients.** (A) Tolerant recipients have comparable total number of circulating B cells on day 7 and 14 post-HTx. Heparinized peripheral blood from Tol mice were collected on days 0, 7 and 14 post-HTx and anti-154+DSC treatment. Absolute counts (cells per microliter) of B cells in the peripheral blood of Tol mice were analyzed on day 0, 7 and 14.  $n=5-6/group$ . Data were pooled from 2 independent experiment. (B) Circulating serum BAFF levels measured by ELISA in naïve or tolerant mice on day 14 and 21 post-HTx,  $n=5/group$ . (C) Serum BAFF levels from MD4 mice that received naïve or tolerant B cells immunized with DSC.  $n=4-5/group$ . Data were pooled from 2 independent experiments and are presented as mean  $\pm$  SEM.  $*p<0.05$ ,  $***p<0.001$ ,  $****p<0.0001$  by one-way ANOVA with Bonferroni post-test.



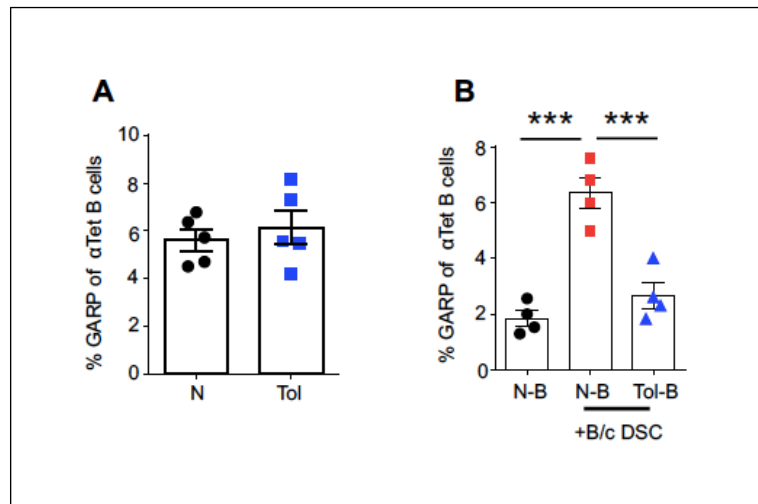

**Supplemental Figure 9. GARP expression is not upregulated in tolerant B cells.** (A) % GARP<sup>+</sup> of  $\alpha$ Tet B cells in naïve and Tol mice,  $n=5/group$ . (B) % GARP of  $\alpha$ Tet B cells in MD4 hosts of naïve B cells or Tol B cells  $\pm$  immunization with B/c DSC, and analyzed on day 14 post-AdTr,  $n=5/group$ . Data were pooled from 2 independent experiments. Data represent mean  $\pm$  SEM. \*\*\* $p<0.001$  by one-way ANOVA with Bonferroni post test.

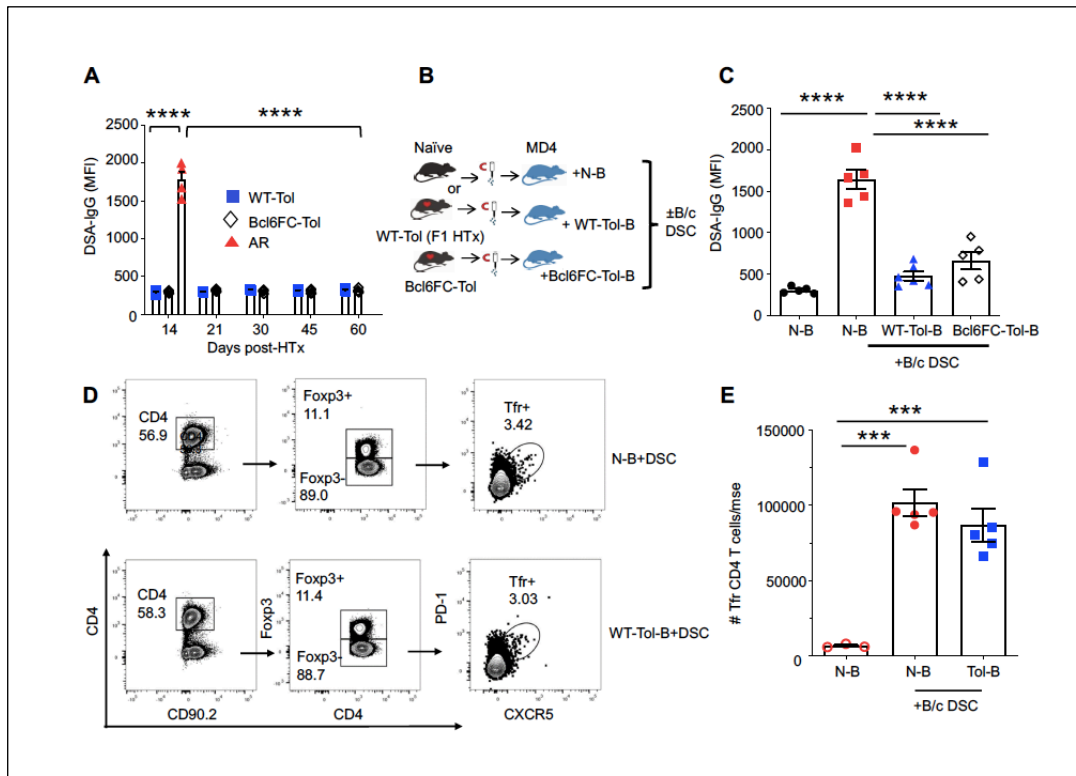

**Supplemental Figure 10. Lack of alloantibody production and induction of B cell tolerance in F1 HTx Bcl6FC recipients treated with CoB.** (A) Tolerant (Tol) C57BL/6 or Bcl6FC mice received F1 HTx and treated with anti-CD154 (D0, 7, 14) + DSC (D0), while AR mice received F1 HTx without treatment. DSA-IgG from WT and Bcl6FC-Tol recipients on day 14, 21, 30, 45, 60, and AR recipients on day 14 post-HTx,  $n=4/group$ . \*\*\*\* $p<0.0001$  by two-way ANOVA with Tukey's post-test for multiple comparisons. (B) Experimental design.  $2 \times 10^7$  enriched B cells from naïve, and WT or Bcl6FC-Tol mice on day 60 post-HTx, together with  $1 \times 10^3$  purified TCR75 T cells and  $5 \times 10^6$  purified B/6 T cells were adoptive transferred (AdTr) into MD4 recipients, which were then immunized with B/c DSC the following day. (C) DSA-IgG (MFI) from naïve B, WT-Tol-B or Bcl6FC-Tol-B cells recipients were measured on day 14 post-AdTr,  $n=5-6/group$ . (D) Gating strategy used to identify follicular regulatory T cells (Tfr). Spleens and LNs (inguinal, axillary, branchial lymph nodes) were harvested from MD4 hosts that received naïve B cells or Tol B cells on day 14 post-AdTr. Foxp3<sup>+</sup> and Foxp3<sup>-</sup> CD4<sup>+</sup> T cells were gated as in the flow plot. Tfr cells are defined as Foxp3<sup>+</sup>CXCR5<sup>hi</sup>PD-1<sup>hi</sup>. (E) Total number of Tfr (Foxp3<sup>+</sup>CXCR5<sup>+</sup>PD-1<sup>+</sup>) CD4 T cells/mse from the spleen and LNs harvested on day 14 post-AdTr, from MD4 mice receiving naïve B or Tol B cells, then immunized with  $2 \times 10^7$  B/c DSC,  $n=3-5/group$ . Data are presented as mean  $\pm$  SEM. \*\*\* $p<0.001$ , \*\*\*\* $p<0.0001$  by one-way ANOVA with Bonferroni post-test.
